# Supplementary material for: Improvement in the catalytic properties of ZSM-5 zeolite nanoparticles via mechanochemical and chemical modifications
Source: Royal Society of Chemistry journal article supplement (doi:10.1039/c5cy01644d), 2015-12-22
Supplement: c5cy01644d1.pdf [file c5cy01644d1.pdf]

Electronic Supporting Information

**Improvement in the catalytic properties of ZSM-5 zeolite nanoparticles via mechanochemical and chemical modifications**

Satoshi Inagaki,<sup>a,\*</sup> Shoma Shinoda,<sup>a</sup> Shunsuke Hayashi,<sup>a</sup> Toru Wakihara,<sup>b</sup> Hiroshi Yamazaki,<sup>c</sup> Junko N. Kondo,<sup>c</sup> Yoshihiro Kubota<sup>a,\*</sup>

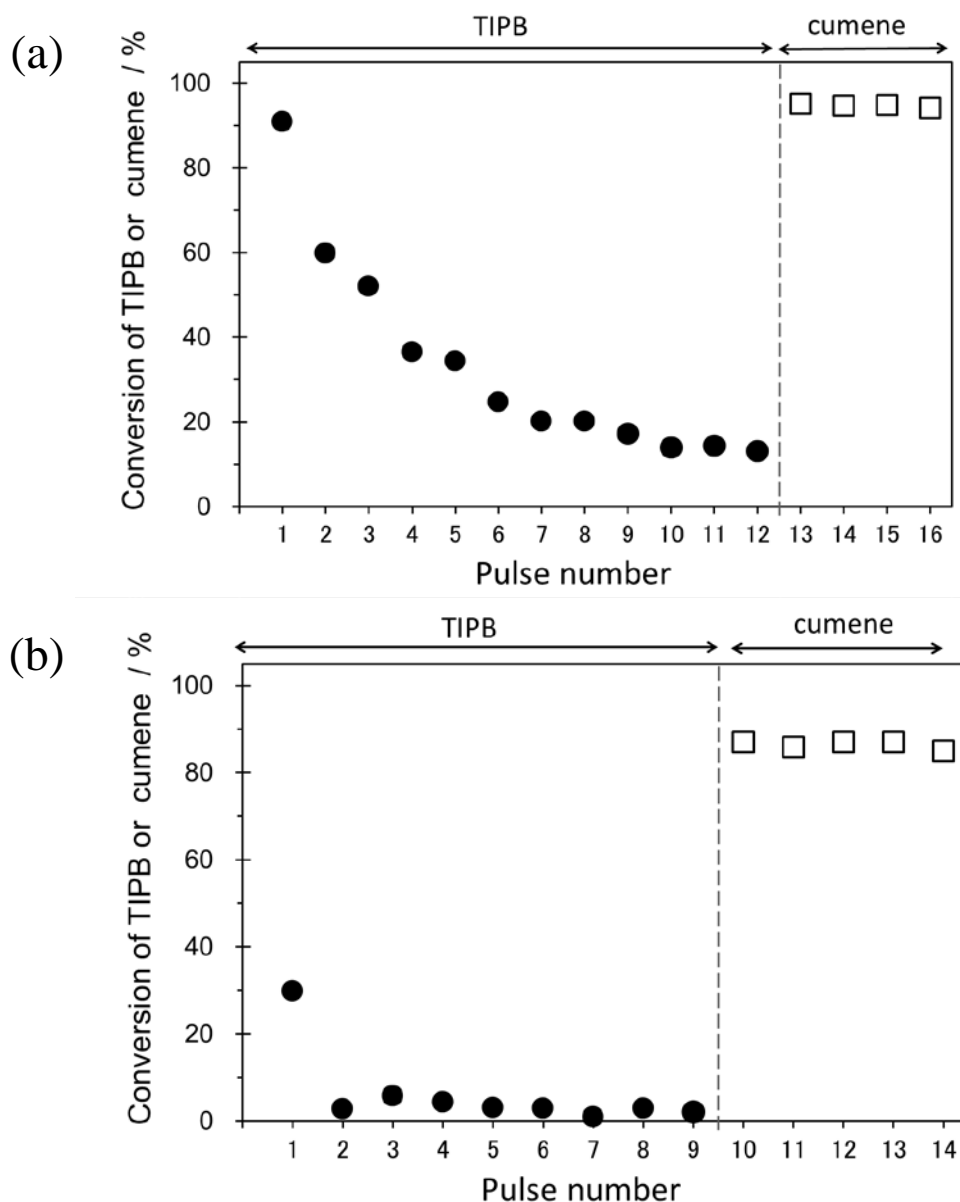

**Figure S1** Catalytic cracking of 1,3,5-triisopropylbenzene or cumene at 300 °C over (a) ZSM-5 nanoparticles (Si/Al = 21.1), and (b) acid-treated ZSM-5 nanoparticles (Si/Al = 49.7). Reaction conditions: weight of catalyst, 20 mg; pellet size, 500–600  $\mu\text{m}$ ; TIPB, 0.6  $\mu\text{L}$ ; cumene, 0.8  $\mu\text{L}$ ; He gas flow rate, 30.0  $\text{cm}^3(\text{N.T.P.}) \text{min}^{-1}$ .

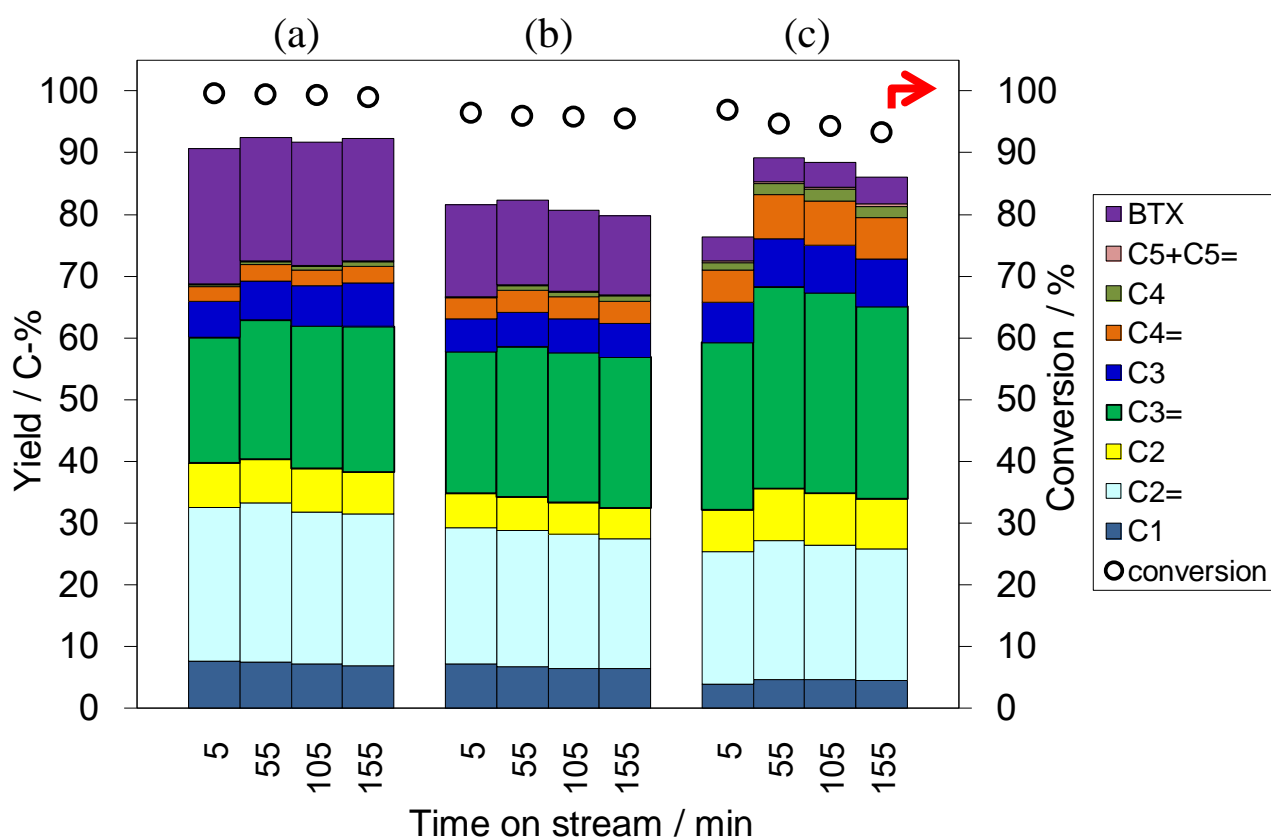

**Figure S2** Product yields in hexane cracking at 650 °C over various ZSM-5 catalysts after adjusting the conversions at a similar level.

(a) Milled and recrystallized ZSM-5 nanoparticles (Si/Al = 21.1, 100 mg, W/F = 19.8 g h mol<sup>-1</sup>); the same data as shown in Fig. 6e. The coke amount on the spent catalyst was 65.1 mg-coke/g-catalyst.

(b) Milled and recrystallized ZSM-5 nanoparticles (Si/Al = 21.1, 50 mg, W/F = 9.9 g h mol<sup>-1</sup>). The coke amount on the spent catalyst was 23.9 mg-coke/g-catalyst.

(c) Milled, recrystallized and acid-treated ZSM-5 nanoparticles (Si/Al = 49.7, 100 mg, W/F = 19.8 g h mol<sup>-1</sup>); the same data as shown in Fig. 6f. The coke amount on the spent catalyst was 7.2 mg-coke/g-catalyst.
